# Supplementary material
Source: MDPI journal article supplement (https://www.mdpi.com/2227-7390/10/5/787)
Supplement: s1 [file s1]

**Table S1** Collected rockburst database

| No | Rock type                               | $\sigma_\theta$ / Mpa | $\sigma_c$ / Mpa | $\sigma_t$ / MPa | $SCF$ | $B_1$ | $B_2$ | $W_{et}$ | Rockburst intensity | Reference          |
|----|-----------------------------------------|-----------------------|------------------|------------------|-------|-------|-------|----------|---------------------|--------------------|
| 1  | Granodiorite                            | 90.00                 | 170              | 11.30            | 0.53  | 15.04 | 0.88  | 9        | Moderate            | Zhou et al.<br>[1] |
| 2  | Syenite                                 | 90.00                 | 220              | 7.40             | 0.41  | 29.73 | 0.93  | 7.3      | Light               |                    |
| 3  | Granodiorite                            | 62.60                 | 165              | 9.40             | 0.38  | 17.55 | 0.89  | 9        | Light               |                    |
| 4  | Granite                                 | 55.40                 | 176              | 7.30             | 0.31  | 24.11 | 0.92  | 9.3      | Moderate            |                    |
| 5  | Dolomitic Limestone                     | 30.00                 | 88.7             | 3.70             | 0.34  | 23.97 | 0.92  | 6.6      | Moderate            |                    |
| 6  | Granite                                 | 48.75                 | 180              | 8.30             | 0.27  | 21.69 | 0.91  | 5        | Moderate            |                    |
| 7  | Quartzite                               | 80.00                 | 180              | 6.70             | 0.44  | 26.87 | 0.93  | 5.5      | Light               |                    |
| 8  | Quartz Diorite                          | 89.00                 | 236              | 8.30             | 0.38  | 28.43 | 0.93  | 5        | Moderate            |                    |
| 9  | Marble                                  | 98.60                 | 120              | 6.50             | 0.82  | 18.46 | 0.90  | 3.8      | Moderate            |                    |
| 10 | Lead and Zinc Ore                       | 108.40                | 140              | 8.00             | 0.77  | 17.50 | 0.89  | 5        | Strong              |                    |
| 11 | Ni Nepheline-nepheline                  | P 57.00               | 180              | 8.30             | 0.32  | 21.69 | 0.91  | 5        | Moderate            |                    |
| 12 | Gneissic Granite                        | 50.00                 | 130              | 6.00             | 0.38  | 21.67 | 0.91  | 5        | Moderate            |                    |
| 13 | Granitic Gneiss                         | 62.50                 | 175              | 7.25             | 0.36  | 24.14 | 0.92  | 5        | Moderate            |                    |
| 14 | Granite                                 | 75.00                 | 180              | 8.30             | 0.42  | 21.69 | 0.91  | 5        | Moderate            |                    |
| 15 | Biotite angle, Flash Plagioclase Schist | 11.00                 | 115              | 5.00             | 0.10  | 23.00 | 0.92  | 5.7      | None                |                    |
| 16 | Diorite Granite                         | 43.40                 | 123              | 6.00             | 0.35  | 20.50 | 0.91  | 5        | Moderate            |                    |
| 17 | Granite                                 | 18.80                 | 178              | 5.70             | 0.11  | 31.23 | 0.94  | 7.4      | None                |                    |
| 18 | Limestone                               | 34.00                 | 150              | 5.40             | 0.23  | 27.78 | 0.93  | 7.8      | None                |                    |
| 19 | Granite                                 | 56.10                 | 131.99           | 9.44             | 0.43  | 13.98 | 0.87  | 7.44     | Moderate            |                    |
| 20 | Granite                                 | 54.20                 | 134              | 9.10             | 0.40  | 0.15  | 0.87  | 7.1      | Moderate            |                    |
| 21 | Granite                                 | 70.30                 | 128.3            | 8.70             | 0.55  | 0.15  | 0.87  | 6.4      | Moderate            |                    |

|    |                          |        |        |       |      |       |      |      |          |
|----|--------------------------|--------|--------|-------|------|-------|------|------|----------|
| 22 | Granite                  | 60.70  | 111.5  | 7.86  | 0.54 | 14.19 | 0.87 | 6.16 | Strong   |
| 23 | Migmatite                | 54.20  | 134    | 9.09  | 0.40 | 15.00 | 0.87 | 7.08 | Moderate |
| 24 | Migmatite                | 70.30  | 129    | 8.73  | 0.55 | 11.40 | 0.87 | 6.43 | Moderate |
| 25 | Biotite granite porphyry | 91.23  | 157.63 | 11.96 | 0.58 | 13.18 | 0.86 | 6.27 | Strong   |
| 26 | Biotite granite porphyry | 66.77  | 148.48 | 8.47  | 0.45 | 17.53 | 0.89 | 5.08 | Light    |
| 27 | Biotite granite porphyry | 51.50  | 132.05 | 6.33  | 0.39 | 20.86 | 0.91 | 4.63 | Moderate |
| 28 | Biotite granite porphyry | 35.82  | 127.93 | 4.43  | 0.28 | 28.90 | 0.93 | 3.67 | Light    |
| 29 | Biotite limestone        | 21.50  | 107.52 | 2.98  | 0.20 | 36.04 | 0.95 | 2.29 | None     |
| 30 | Biotite limestone        | 18.32  | 96.41  | 2.01  | 0.19 | 47.93 | 0.96 | 1.87 | None     |
| 31 | Biotite limestone        | 110.30 | 167.19 | 12.67 | 0.66 | 13.20 | 0.86 | 6.83 | Strong   |
| 32 | Biotite limestone        | 26.06  | 118.46 | 3.51  | 0.22 | 33.75 | 0.94 | 2.89 | Light    |
| 33 | Biotite granite porphyry | 16.62  | 156.86 | 10.66 | 0.11 | 14.71 | 0.87 | 4.83 | Moderate |
| 34 | Biotite granite porphyry | 16.47  | 156.9  | 10.33 | 0.11 | 15.19 | 0.88 | 4.39 | Moderate |
| 35 | Biotite granite porphyry | 16.43  | 157.95 | 11.06 | 0.10 | 14.28 | 0.87 | 4.99 | Strong   |
| 36 | Biotite granite porphyry | 16.30  | 155.28 | 10.63 | 0.11 | 14.61 | 0.87 | 4.4  | Moderate |
| 37 | Biotite granite porphyry | 15.97  | 114.07 | 11.96 | 0.14 | 9.54  | 0.81 | 2.4  | None     |
| 38 | Biotite granite porphyry | 19.14  | 106.31 | 11.96 | 0.18 | 8.89  | 0.80 | 2.07 | None     |
| 39 | Biotite granite porphyry | 12.96  | 117.81 | 11.96 | 0.11 | 9.85  | 0.82 | 2.49 | None     |
| 40 | Biotite granite porphyry | 31.05  | 147.85 | 11.96 | 0.21 | 12.36 | 0.85 | 3    | Moderate |
| 41 | Biotite granite porphyry | 29.09  | 138.5  | 11.96 | 0.21 | 11.58 | 0.84 | 2.77 | None     |
| 42 | Biotite granite porphyry | 32.40  | 140.88 | 11.96 | 0.23 | 11.78 | 0.84 | 2.86 | Light    |
| 43 | Biotite granite porphyry | 34.89  | 151.7  | 10.66 | 0.23 | 14.23 | 0.87 | 3.17 | Light    |
| 44 | Biotite granite porphyry | 16.21  | 135.07 | 10.33 | 0.12 | 13.08 | 0.86 | 2.49 | Light    |
| 45 | Biotite granite porphyry | 30.56  | 160.83 | 11.06 | 0.19 | 14.54 | 0.87 | 3.63 | Strong   |
| 46 | Biotite granite porphyry | 19.36  | 113.87 | 4.43  | 0.17 | 25.70 | 0.93 | 2.38 | Light    |
| 47 | Biotite limestone        | 33.15  | 106.94 | 2.98  | 0.31 | 35.89 | 0.95 | 2.15 | Moderate |

|    |                   |       |        |       |      |       |      |      |          |
|----|-------------------|-------|--------|-------|------|-------|------|------|----------|
| 48 | Biotite limestone | 9.74  | 88.51  | 2.98  | 0.11 | 29.70 | 0.93 | 1.77 | None     |
| 49 | Biotite limestone | 11.75 | 83.96  | 2.98  | 0.14 | 28.17 | 0.93 | 2.15 | None     |
| 50 | Biotite limestone | 39.94 | 117.48 | 2.98  | 0.34 | 39.42 | 0.95 | 2.37 | Light    |
| 51 | Biotite limestone | 39.82 | 128.46 | 2.98  | 0.31 | 43.11 | 0.95 | 2.4  | Moderate |
| 52 | Biotite limestone | 46.22 | 140.07 | 2.01  | 0.33 | 69.69 | 0.97 | 3.29 | Light    |
| 53 | Biotite limestone | 30.95 | 123.79 | 12.67 | 0.25 | 9.77  | 0.81 | 2.57 | Light    |
| 54 | Biotite limestone | 40.99 | 186.3  | 12.67 | 0.22 | 14.70 | 0.87 | 4.1  | Moderate |
| 55 | Biotite limestone | 20.82 | 122.47 | 12.67 | 0.17 | 9.67  | 0.81 | 2.81 | Light    |
| 56 | Biotite limestone | 36.09 | 164.05 | 12.67 | 0.22 | 12.95 | 0.86 | 3.59 | Moderate |
| 57 | Clayey sandstone  | 7.28  | 52     | 3.70  | 0.14 | 14.05 | 0.87 | 1.3  | None     |
| 58 | Marble            | 9.57  | 99.7   | 4.80  | 0.10 | 20.77 | 0.91 | 3.8  | None     |
| 59 | Sandstone         | 34.15 | 54.2   | 12.10 | 0.63 | 4.48  | 0.63 | 3.17 | Light    |
| 60 | Granite           | 60.00 | 135    | 15.04 | 0.44 | 8.98  | 0.80 | 4.86 | Light    |
| 61 | Marble            | 60.00 | 66.49  | 9.72  | 0.90 | 6.84  | 0.74 | 2.15 | Light    |
| 62 | Migmatite         | 60.00 | 106.38 | 11.20 | 0.56 | 9.50  | 0.81 | 6.11 | Light    |
| 63 | Peridotite        | 60.00 | 86.03  | 7.14  | 0.70 | 12.05 | 0.85 | 2.85 | Light    |
| 64 | Lherzolite        | 60.00 | 149.19 | 9.30  | 0.40 | 16.04 | 0.88 | 3.5  | Light    |
| 65 | Amphibolite       | 60.00 | 136.79 | 10.42 | 0.44 | 13.13 | 0.86 | 2.12 | Light    |
| 66 | Sandstone         | 63.80 | 110    | 4.50  | 0.58 | 24.40 | 0.92 | 6.31 | Moderate |
| 67 | Dolomite          | 2.60  | 20     | 3.00  | 0.13 | 6.67  | 0.74 | 1.39 | None     |
| 68 | Phosphate rock    | 44.40 | 120    | 5.00  | 0.37 | 24.00 | 0.92 | 5.1  | Light    |
| 69 | Red Shale         | 13.50 | 30     | 2.67  | 0.45 | 11.20 | 0.84 | 2.03 | Light    |
| 70 | Sandstone         | 70.40 | 110    | 4.50  | 0.64 | 24.40 | 0.92 | 6.31 | Moderate |
| 71 | Dolomite          | 3.80  | 20     | 3.00  | 0.19 | 6.67  | 0.74 | 1.39 | None     |
| 72 | Phosphate rock    | 57.60 | 120    | 5.00  | 0.48 | 24.00 | 0.92 | 5.1  | Moderate |
| 73 | Red Shale         | 19.50 | 30     | 2.67  | 0.65 | 11.20 | 0.84 | 2.03 | Moderate |

|    |                      |       |       |       |      |       |      |      |          |
|----|----------------------|-------|-------|-------|------|-------|------|------|----------|
| 74 | Sandstone            | 81.40 | 110   | 4.50  | 0.74 | 24.40 | 0.92 | 6.31 | Strong   |
| 75 | Dolomite             | 4.60  | 20    | 3.00  | 0.23 | 6.67  | 0.74 | 1.39 | None     |
| 76 | Phosphate rock       | 73.20 | 120   | 5.00  | 0.61 | 24.00 | 0.92 | 5.1  | Moderate |
| 77 | Red Shale            | 30.00 | 30    | 2.67  | 1.00 | 11.20 | 0.84 | 2.03 | Strong   |
| 78 | Limestone            | 15.20 | 53.8  | 5.56  | 0.28 | 9.68  | 0.81 | 1.92 | None     |
| 79 | Diorite              | 88.90 | 142   | 13.20 | 0.63 | 10.70 | 0.83 | 3.62 | Strong   |
| 80 | Iron ore             | 59.82 | 85.8  | 7.31  | 0.70 | 11.70 | 0.84 | 2.78 | Moderate |
| 81 | Skarn                | 32.30 | 67.4  | 6.70  | 0.48 | 10.10 | 0.82 | 1.1  | None     |
| 82 | Dolomitic limestone  | 30.10 | 88.7  | 3.70  | 0.34 | 23.97 | 0.92 | 6.6  | Strong   |
| 83 | Granite              | 18.80 | 171.5 | 6.30  | 0.11 | 27.22 | 0.93 | 7    | None     |
| 84 | Limestone            | 34.00 | 149   | 5.90  | 0.23 | 25.25 | 0.92 | 7.6  | Light    |
| 85 | Clay sandstone       | 38.20 | 53    | 3.90  | 0.72 | 13.59 | 0.86 | 1.6  | None     |
| 86 | Marble               | 11.30 | 90    | 4.80  | 0.13 | 18.75 | 0.90 | 3.6  | None     |
| 87 | Limestone            | 92.00 | 263   | 10.70 | 0.35 | 24.58 | 0.92 | 8    | Light    |
| 88 | Diorite              | 62.40 | 235   | 9.50  | 0.27 | 24.74 | 0.92 | 9    | Strong   |
| 89 | Granite              | 43.40 | 136.5 | 7.20  | 0.32 | 18.96 | 0.90 | 5.6  | Strong   |
| 90 | Diastatite anorthose | 11.00 | 105   | 4.90  | 0.10 | 21.43 | 0.91 | 4.7  | None     |
| 91 | Mica Marble          | 46.40 | 100   | 4.90  | 0.46 | 20.40 | 0.91 | 2    | Light    |
| 92 | Grey-white Marble    | 23.00 | 80    | 3.00  | 0.29 | 26.80 | 0.93 | 0.85 | Light    |
| 93 | Granophyric Marble   | 46.20 | 105   | 5.30  | 0.44 | 19.70 | 0.90 | 2.3  | Light    |
| 94 | Crystal Tuff         | 35.00 | 133.4 | 9.30  | 0.26 | 14.34 | 0.87 | 2.9  | Light    |
| 95 | N/A                  | 13.90 | 124   | 4.22  | 0.11 | 29.40 | 0.93 | 2.04 | None     |
| 96 | N/A                  | 17.40 | 161   | 3.98  | 0.14 | 31.40 | 0.95 | 2.19 | Light    |
| 97 | N/A                  | 19.00 | 153   | 4.48  | 0.15 | 28.10 | 0.94 | 2.11 | Light    |
| 98 | N/A                  | 19.70 | 142   | 4.55  | 0.16 | 27.90 | 0.94 | 2.26 | Light    |
| 99 | Marble               | 18.70 | 81.2  | 10.60 | 0.23 | 7.66  | 0.77 | 1.5  | None     |

|     |                                 |        |        |       |      |       |      |      |          |
|-----|---------------------------------|--------|--------|-------|------|-------|------|------|----------|
| 100 | Marble                          | 23.60  | 82.8   | 11.20 | 0.29 | 7.39  | 0.76 | 1.5  | None     |
| 101 | Granite Porphyry                | 28.60  | 123.6  | 11.50 | 0.23 | 10.75 | 0.83 | 2.5  | None     |
| 102 | Granite Porphyry                | 72.00  | 120.5  | 14.90 | 0.60 | 8.09  | 0.78 | 2.5  | None     |
| 103 | Diorite                         | 29.80  | 132.2  | 7.80  | 0.23 | 16.95 | 0.89 | 4.6  | None     |
| 104 | Diorite                         | 44.60  | 130.5  | 11.09 | 0.34 | 11.77 | 0.84 | 4.6  | None     |
| 105 | Diorite                         | 66.10  | 135.2  | 10.90 | 0.49 | 12.40 | 0.85 | 4.6  | Light    |
| 106 | Diorite                         | 99.40  | 129.5  | 11.30 | 0.77 | 11.46 | 0.84 | 4.6  | Light    |
| 107 | Dioritic Porphyrite             | 33.60  | 156.3  | 10.20 | 0.21 | 15.32 | 0.88 | 5.2  | Light    |
| 108 | Dioritic Porphyrite             | 109.50 | 155.8  | 11.77 | 0.70 | 13.24 | 0.86 | 5.2  | Moderate |
| 109 | Magnetite                       | 26.90  | 92.6   | 9.52  | 0.29 | 9.73  | 0.81 | 3.7  | Light    |
| 110 | Magnetite                       | 38.30  | 90.1   | 10.20 | 0.43 | 8.83  | 0.80 | 3.7  | Moderate |
| 111 | Magnetite                       | 83.90  | 95.6   | 8.69  | 0.88 | 11.00 | 0.83 | 3.7  | Light    |
| 112 | Granite                         | 55.90  | 126.8  | 6.56  | 0.44 | 19.33 | 0.90 | 8.1  | Strong   |
| 113 | Granite                         | 109.90 | 128.5  | 9.63  | 0.86 | 13.34 | 0.86 | 8.1  | Strong   |
| 114 | Skarn                           | 59.90  | 96.5   | 8.00  | 0.62 | 12.06 | 0.85 | 1.8  | Light    |
| 115 | Quartz-<br>feldspar<br>Porphyry | 68.00  | 106.8  | 6.10  | 0.64 | 17.51 | 0.89 | 7.2  | Strong   |
| 116 | Limestone                       | 50.60  | 63.83  | 5.06  | 0.79 | 12.61 | 0.85 | 2.23 | Light    |
| 117 | Limestone                       | 50.60  | 85.36  | 4.91  | 0.59 | 17.38 | 0.89 | 3.41 | Light    |
| 118 | Lead-zinc                       | 50.60  | 104.97 | 6.18  | 0.48 | 16.99 | 0.89 | 10.9 | Strong   |
| 119 | Pyrite                          | 50.60  | 153.1  | 10.48 | 0.33 | 14.61 | 0.87 | 3.14 | Light    |
| 120 | Gneissic granite                | 120.80 | 151.6  | 10.10 | 0.80 | 15.01 | 0.88 | 20   | Strong   |
| 121 | Porphyritic biotite granite     | 119.32 | 138.6  | 7.74  | 0.86 | 17.91 | 0.89 | 30   | Strong   |
| 122 | Porphyritic granite             | 95.67  | 127.37 | 10.51 | 0.75 | 12.12 | 0.85 | 30   | Strong   |
| 123 | Monzogranite                    | 114.44 | 174.71 | 14.42 | 0.66 | 12.12 | 0.85 | 10   | Strong   |
| 124 | Monzogranite                    | 127.60 | 145.42 | 13.70 | 0.88 | 10.61 | 0.83 | 10   | Strong   |

|     |                           |        |        |       |      |       |      |      |          |
|-----|---------------------------|--------|--------|-------|------|-------|------|------|----------|
| 125 | Monzogranite              | 126.41 | 158.03 | 14.32 | 0.80 | 11.04 | 0.83 | 10   | Strong   |
| 126 | Monzogranite              | 108.53 | 113.37 | 10.43 | 0.96 | 10.87 | 0.83 | 10   | Strong   |
| 127 | Metasandstone             | 29.04  | 124.15 | 5.00  | 0.23 | 24.30 | 0.92 | 4.39 | None     |
| 128 | Sandy slate               | 40.87  | 139    | 6.00  | 0.29 | 23.17 | 0.92 | 0.81 | None     |
| 129 | Metasandstone             | 50.09  | 124    | 5.00  | 0.40 | 24.80 | 0.92 | 6.53 | Light    |
| 130 | Sandy slate               | 59.09  | 88.25  | 3.60  | 0.67 | 24.51 | 0.92 | 6.14 | Moderate |
| 131 | Metasandstone             | 62.13  | 124    | 5.00  | 0.50 | 24.80 | 0.92 | 4.62 | Light    |
| 132 | Sandy slate               | 40.90  | 88.25  | 3.60  | 0.46 | 24.51 | 0.92 | 4.61 | Light    |
| 133 | Sandy slate               | 22.93  | 88.25  | 3.60  | 0.26 | 24.51 | 0.92 | 0.81 | None     |
| 134 | Amphibolite plagiogneiss  | 47.50  | 86.3   | 15.60 | 0.55 | 5.53  | 0.69 | 6.3  | Moderate |
| 135 | Black mica oblique gneiss | 47.50  | 61.1   | 5.30  | 0.78 | 11.53 | 0.84 | 7.2  | Moderate |
| 136 | Copper ore                | 47.50  | 99.2   | 7.30  | 0.48 | 13.59 | 0.86 | 8.31 | Moderate |
| 137 | Diabase                   | 47.50  | 91.3   | 14.50 | 0.52 | 6.30  | 0.73 | 21   | Moderate |
| 138 | Amphibolite plagiogneiss  | 67.20  | 86.3   | 15.60 | 0.78 | 5.53  | 0.69 | 6.3  | Moderate |
| 139 | Black mica oblique gneiss | 67.20  | 61.1   | 5.30  | 1.10 | 11.53 | 0.84 | 7.2  | Moderate |
| 140 | Copper ore                | 67.20  | 99.2   | 7.30  | 0.68 | 13.59 | 0.86 | 8.31 | Moderate |
| 141 | Diabase                   | 67.20  | 91.3   | 14.50 | 0.74 | 6.30  | 0.73 | 21   | Moderate |
| 142 | Amphibolite plagiogneiss  | 77.00  | 86.3   | 15.60 | 0.89 | 5.53  | 0.69 | 6.3  | Strong   |
| 143 | Black mica oblique gneiss | 77.00  | 61.1   | 5.30  | 1.26 | 11.53 | 0.84 | 7.2  | Strong   |
| 144 | Copper ore                | 77.00  | 99.2   | 7.30  | 0.78 | 13.59 | 0.86 | 8.31 | Strong   |
| 145 | Diabase                   | 77.00  | 91.3   | 14.50 | 0.84 | 6.30  | 0.73 | 21   | Strong   |
| 146 | Amphibolite plagiogneiss  | 225.50 | 86.3   | 15.60 | 2.61 | 5.53  | 0.69 | 6.3  | Strong   |
| 147 | Black mica oblique        | 225.50 | 61.1   | 5.30  | 3.69 | 11.53 | 0.84 | 7.2  | Strong   |

|     |                           |        |       |       |      |       |      |       |          |
|-----|---------------------------|--------|-------|-------|------|-------|------|-------|----------|
|     | gneiss                    |        |       |       |      |       |      |       |          |
| 148 | Copper ore                | 225.50 | 99.2  | 7.30  | 2.27 | 13.59 | 0.86 | 8.31  | Strong   |
| 149 | Diabase                   | 225.50 | 91.3  | 14.50 | 2.47 | 6.30  | 0.73 | 21    | Strong   |
| 150 | Amphibolite plagiogneiss  | 274.30 | 86.3  | 15.60 | 3.18 | 5.53  | 0.69 | 6.3   | Strong   |
| 151 | Black mica oblique gneiss | 274.30 | 61.1  | 5.30  | 4.49 | 11.53 | 0.84 | 7.2   | Strong   |
| 152 | Copper ore                | 274.30 | 99.2  | 7.30  | 2.77 | 13.59 | 0.86 | 8.31  | Strong   |
| 153 | Diabase                   | 274.30 | 91.3  | 14.50 | 3.00 | 6.30  | 0.73 | 21    | Strong   |
| 154 | Amphibolite plagiogneiss  | 297.80 | 86.3  | 15.60 | 3.45 | 5.53  | 0.69 | 6.3   | Strong   |
| 155 | Black mica oblique gneiss | 297.80 | 61.1  | 5.30  | 4.87 | 11.53 | 0.84 | 7.2   | Strong   |
| 156 | Copper ore                | 297.80 | 99.2  | 7.30  | 3.00 | 13.59 | 0.86 | 8.31  | Strong   |
| 157 | Diabase                   | 297.80 | 91.3  | 14.50 | 3.26 | 6.30  | 0.73 | 21    | Strong   |
| 158 | Huanglong group marble    | 77.69  | 74.04 | 8.96  | 1.05 | 8.26  | 0.78 | 1.33  | None     |
| 159 | Qixia group marble        | 77.07  | 78.3  | 6.80  | 0.98 | 11.51 | 0.84 | 3.11  | Moderate |
| 160 | Skarn                     | 67.18  | 132.2 | 16.40 | 0.51 | 8.06  | 0.78 | 3.97  | Moderate |
| 161 | Garnet skarn              | 75.03  | 128.6 | 13.00 | 0.58 | 9.89  | 0.82 | 5.76  | Moderate |
| 162 | Quartz sandstone          | 80.54  | 237.2 | 17.66 | 0.34 | 13.43 | 0.86 | 6.38  | Moderate |
| 163 | Siltstone                 | 80.04  | 171.3 | 22.60 | 0.47 | 7.58  | 0.77 | 7.27  | Strong   |
| 164 | Diorite porphyry          | 72.56  | 304.2 | 20.90 | 0.24 | 14.56 | 0.87 | 10.57 | Strong   |
| 165 | Limestone                 | 47.56  | 58.5  | 3.50  | 0.81 | 16.71 | 0.89 | 5     | Light    |
| 166 | Limestone                 | 43.62  | 78.1  | 3.20  | 0.56 | 24.41 | 0.92 | 6     | Light    |
| 167 | Limestone                 | 47.56  | 80.3  | 3.50  | 0.59 | 22.94 | 0.92 | 5     | Moderate |
| 168 | Limestone                 | 44.71  | 82.4  | 4.70  | 0.54 | 17.53 | 0.89 | 6.6   | Moderate |
| 169 | Rhyolite                  | 25.70  | 59.7  | 1.30  | 0.43 | 45.90 | 0.96 | 1.7   | None     |
| 170 | Rhyolite                  | 26.90  | 62.8  | 2.10  | 0.42 | 29.90 | 0.94 | 2.4   | Light    |

|     |                     |       |      |      |      |       |      |      |          |
|-----|---------------------|-------|------|------|------|-------|------|------|----------|
| 171 | Rhyolite            | 40.40 | 72.1 | 2.10 | 0.56 | 34.30 | 0.94 | 1.9  | Light    |
| 172 | Rhyolite            | 39.40 | 65.2 | 2.30 | 0.60 | 28.30 | 0.93 | 3.4  | Moderate |
| 173 | Rhyolite            | 38.20 | 71.4 | 3.40 | 0.53 | 21.00 | 0.91 | 3.6  | Moderate |
| 174 | Rhyolite            | 45.70 | 69.1 | 3.20 | 0.66 | 21.50 | 0.91 | 4.1  | Moderate |
| 175 | Rhyolite            | 35.80 | 67.8 | 3.80 | 0.52 | 17.80 | 0.89 | 4.3  | Moderate |
| 176 | Rhyolite            | 39.40 | 69.2 | 2.70 | 0.57 | 25.60 | 0.92 | 3.8  | Moderate |
| 177 | Rhyolite            | 40.60 | 66.6 | 2.60 | 0.61 | 25.60 | 0.92 | 3.7  | Moderate |
| 178 | Rhyolite            | 39.00 | 70.1 | 2.40 | 0.56 | 29.20 | 0.93 | 4.8  | Moderate |
| 179 | Rhyolite            | 57.20 | 80.6 | 2.50 | 0.71 | 32.20 | 0.94 | 5.5  | Strong   |
| 180 | Rhyolite            | 55.60 | 114  | 2.30 | 0.49 | 49.50 | 0.96 | 4.7  | Moderate |
| 181 | Rhyolite            | 56.90 | 123  | 2.70 | 0.46 | 45.50 | 0.96 | 5.2  | Moderate |
| 182 | Rhyolite            | 62.10 | 132  | 2.40 | 0.47 | 55.00 | 0.96 | 5    | Moderate |
| 183 | Rhyolite            | 29.70 | 116  | 2.70 | 0.26 | 42.90 | 0.95 | 3.7  | Light    |
| 184 | Rhyolite            | 29.10 | 94   | 2.60 | 0.31 | 36.10 | 0.95 | 3.2  | Light    |
| 185 | Rhyolite            | 27.80 | 90   | 2.10 | 0.31 | 42.80 | 0.95 | 1.8  | None     |
| 186 | Rhyolite            | 30.30 | 88   | 3.10 | 0.34 | 28.30 | 0.93 | 3    | Light    |
| 187 | Rhyolite            | 55.60 | 114  | 2.30 | 0.49 | 49.50 | 0.96 | 4.7  | Moderate |
| 188 | Rhyolite            | 41.60 | 67.6 | 2.70 | 0.61 | 25.00 | 0.92 | 3.7  | Moderate |
| 189 | Rhyolite            | 40.10 | 72.1 | 2.30 | 0.55 | 31.30 | 0.94 | 4.6  | Moderate |
| 190 | Rhyolite            | 58.20 | 83.6 | 2.60 | 0.69 | 32.10 | 0.94 | 5.9  | Strong   |
| 191 | Rhyolite            | 56.80 | 112  | 2.20 | 0.50 | 50.90 | 0.96 | 5.2  | Moderate |
| 192 | N/A                 | 47.56 | 58.5 | 3.50 | 0.81 | 16.71 | 0.89 | 5    | Light    |
| 193 | Limestone and shale | 42.40 | 50   | 6.10 | 0.85 | 8.20  | 0.78 | 5.3  | Light    |
| 194 | Limestone and shale | 63.60 | 50   | 4.00 | 1.27 | 12.50 | 0.85 | 5.3  | Moderate |
| 195 | Sandstone Slate     | 18.64 | 70   | 4.85 | 0.27 | 14.43 | 0.87 | 7.27 | Strong   |
| 196 | Sandstone Slate     | 18.20 | 60   | 1.90 | 0.30 | 31.58 | 0.94 | 2.84 | Light    |



|     |                                 |       |        |       |      |       |      |      |          |
|-----|---------------------------------|-------|--------|-------|------|-------|------|------|----------|
| 197 | Granite                         | 53.00 | 147.2  | 7.18  | 0.36 | 20.50 | 0.91 | 5    | Moderate |
| 198 | Bedrock                         | 16.40 | 156.23 | 10.51 | 0.10 | 14.86 | 0.87 | 4.14 | Light    |
| 199 | Bedrock                         | 16.40 | 156.14 | 10.30 | 0.11 | 15.16 | 0.88 | 4.04 | Light    |
| 200 | Bedrock                         | 16.40 | 157.34 | 10.55 | 0.10 | 14.91 | 0.87 | 4.26 | Moderate |
| 201 | Bedrock                         | 16.40 | 155.63 | 10.42 | 0.11 | 14.94 | 0.87 | 4.2  | Moderate |
| 202 | Dolomitic limestone             | 12.00 | 30     | 5.58  | 0.40 | 5.38  | 0.69 | 5.1  | None     |
| 203 | Biotite granite                 | 50.28 | 77.3   | 7.65  | 0.65 | 10.11 | 0.82 | 2.47 | Light    |
| 204 | Phyllic of granite              | 50.28 | 94.7   | 5.26  | 0.53 | 18.01 | 0.89 | 2.96 | Moderate |
| 205 | phyllic of granitic cataclasite | 50.28 | 59     | 5.23  | 0.85 | 11.28 | 0.84 | 0.88 | None     |
| 206 | Biotite granite                 | 44.80 | 77.3   | 7.65  | 0.58 | 10.11 | 0.82 | 2.47 | Light    |
| 207 | Biotite granite                 | 48.00 | 77.3   | 7.65  | 0.62 | 10.11 | 0.82 | 2.47 | Light    |
| 208 | Biotite granite                 | 53.40 | 77.3   | 7.65  | 0.69 | 10.11 | 0.82 | 2.47 | Light    |
| 209 | Biotite granite                 | 54.90 | 77.3   | 7.65  | 0.71 | 10.11 | 0.82 | 2.47 | Light    |
| 210 | Phyllic of granite              | 44.80 | 94.7   | 5.26  | 0.47 | 18.01 | 0.89 | 2.96 | Moderate |
| 211 | Phyllic of granite              | 48.00 | 94.7   | 5.26  | 0.51 | 18.01 | 0.89 | 2.96 | Moderate |
| 212 | Phyllic of granite              | 53.40 | 94.7   | 5.26  | 0.56 | 18.01 | 0.89 | 2.96 | Moderate |
| 213 | Phyllic of granite              | 54.90 | 94.7   | 5.26  | 0.58 | 18.01 | 0.89 | 2.96 | Moderate |
| 214 | Phyllic of granitic cataclasite | 44.80 | 59     | 5.23  | 0.76 | 11.28 | 0.84 | 0.88 | None     |
| 215 | Phyllic of granitic cataclasite | 48.00 | 59     | 5.23  | 0.81 | 11.28 | 0.84 | 0.88 | None     |
| 216 | Phyllic of granitic cataclasite | 53.40 | 59     | 5.23  | 0.91 | 11.28 | 0.84 | 0.88 | None     |
| 217 | Phyllic of granitic cataclasite | 54.90 | 59     | 5.23  | 0.93 | 11.28 | 0.84 | 0.88 | None     |

|     |                                                                                             |       |     |      |      |       |      |     |          |
|-----|---------------------------------------------------------------------------------------------|-------|-----|------|------|-------|------|-----|----------|
| 218 | Sandstone                                                                                   | 12.00 | 85  | 3.60 | 0.14 | 23.61 | 0.92 | 1.5 | None     |
| 219 | Marble sandstone                                                                            | 21.00 | 103 | 4.10 | 0.20 | 25.12 | 0.92 | 2.4 | Light    |
| 220 | Marble sandstone                                                                            | 28.00 | 100 | 3.90 | 0.28 | 25.64 | 0.92 | 2.3 | Light    |
| 221 | Brecciated marble                                                                           | 47.00 | 122 | 5.50 | 0.39 | 22.18 | 0.91 | 3.4 | Light    |
| 222 | Marble                                                                                      | 52.00 | 117 | 4.80 | 0.44 | 24.38 | 0.92 | 3.2 | Light    |
| 223 | Marble                                                                                      | 42.00 | 117 | 4.80 | 0.36 | 24.38 | 0.92 | 3.2 | Light    |
| 224 | Marble                                                                                      | 32.00 | 117 | 4.80 | 0.27 | 24.38 | 0.92 | 3.2 | Light    |
| 225 | Banded marble<br>argillaceous limestone                                                     | 24.00 | 110 | 4.40 | 0.22 | 25.00 | 0.92 | 3   | Light    |
| 226 | Argillaceous limestone                                                                      | 20.00 | 112 | 4.70 | 0.18 | 23.83 | 0.92 | 2.5 | None     |
| 227 | Weathered and fresh<br>welded tuff, tuff breccia<br>and the K- feldspar<br>granite porphyry | 32.80 | 160 | 6.60 | 0.21 | 24.30 | 0.92 | 4.6 | Light    |
| 228 | Weathered and fresh<br>welded tuff, tuff breccia<br>and the K- feldspar<br>granite porphyry | 44.80 | 160 | 6.80 | 0.28 | 23.60 | 0.92 | 4.9 | Light    |
| 229 | Weathered and fresh<br>welded tuff, tuff breccia<br>and the K- feldspar<br>granite porphyry | 50.90 | 160 | 7.50 | 0.32 | 21.30 | 0.91 | 5.3 | Moderate |
| 230 | Weathered and fresh<br>welded tuff, tuff breccia<br>and the K- feldspar<br>granite porphyry | 44.80 | 160 | 6.70 | 0.28 | 23.80 | 0.92 | 4.8 | Light    |

|     |                                                                                    |        |        |       |      |       |      |      |          |                   |
|-----|------------------------------------------------------------------------------------|--------|--------|-------|------|-------|------|------|----------|-------------------|
| 231 | Weathered and fresh welded tuff, tuff breccia and the K- feldspar granite porphyry | 22.40  | 160    | 6.60  | 0.14 | 24.10 | 0.92 | 4.3  | Light    |                   |
| 232 | Amphibolite syenite                                                                | 20.61  | 54.23  | 21.49 | 0.38 | 2.52  | 0.43 | 3.17 | Light    |                   |
| 233 | Granite                                                                            | 48.00  | 120    | 1.50  | 0.40 | 80.00 | 0.98 | 5.8  | Moderate |                   |
| 234 | Granite                                                                            | 49.50  | 110    | 1.50  | 0.45 | 73.33 | 0.97 | 5.7  | Moderate |                   |
| 235 | Granite                                                                            | 63.00  | 115    | 1.50  | 0.55 | 76.67 | 0.97 | 5.7  | Moderate |                   |
| 236 | Dolomitic limestone                                                                | 17.39  | 102.3  | 1.30  | 0.17 | 78.69 | 0.97 | 6.58 | Moderate |                   |
| 237 | Dolomitic limestone                                                                | 17.02  | 85.09  | 1.30  | 0.20 | 65.45 | 0.97 | 6.14 | Moderate |                   |
| 238 | Dolomite                                                                           | 16.70  | 83.5   | 1.30  | 0.20 | 64.23 | 0.97 | 6.53 | Moderate |                   |
| 239 | Dolomite                                                                           | 17.35  | 86.77  | 1.30  | 0.20 | 66.75 | 0.97 | 3.22 | Moderate |                   |
| 240 | Sandy slate                                                                        | 16.87  | 80.33  | 1.30  | 0.21 | 61.79 | 0.97 | 6.92 | Moderate |                   |
| 241 | Sandy slate                                                                        | 17.08  | 94.9   | 1.30  | 0.18 | 73.00 | 0.97 | 6.91 | Moderate |                   |
| 242 | Moderately weathered granodiorite porphyry                                         | 61.72  | 92.4   | 8.28  | 0.67 | 11.16 | 0.84 | 5.43 | Light    |                   |
| 243 | Fresh granodiorite porphyry                                                        | 126.72 | 189.7  | 8.95  | 0.67 | 21.20 | 0.91 | 5.43 | Light    |                   |
| 244 | Granite porphyry                                                                   | 57.97  | 125.37 | 7.74  | 0.67 | 21.20 | 0.88 | 2.86 | Light    |                   |
| 245 | Granite porphyry                                                                   | 57.97  | 96.16  | 3.77  | 0.46 | 16.20 | 0.92 | 2.53 | Light    |                   |
| 246 | Granite porphyry                                                                   | 57.97  | 70.68  | 4.19  | 0.60 | 25.51 | 0.89 | 2.87 | Light    |                   |
| 247 | Yanshanian granite biotite                                                         | 98.02  | 148.52 | 6.66  | 0.66 | 22.30 | 0.91 | 3.23 | Moderate | Xue et al.<br>[2] |
| 248 | Yanshanian granite biotite                                                         | 116.88 | 162.33 | 12.30 | 0.72 | 13.20 | 0.86 | 5.23 | Strong   |                   |
| 249 | Yanshanian biotite                                                                 | 43.21  | 116.78 | 3.93  | 0.37 | 29.73 | 0.93 | 3.52 | Light    |                   |

|     |            |         |        |        |       |      |       |      |      |          |
|-----|------------|---------|--------|--------|-------|------|-------|------|------|----------|
|     | granite    |         |        |        |       |      |       |      |      |          |
| 250 | Yanshanian | biotite | 45.92  | 109.33 | 3.34  | 0.42 | 32.77 | 0.94 | 2.97 | Light    |
|     | granite    |         |        |        |       |      |       |      |      |          |
| 251 | Yanshanian | biotite | 27.60  | 98.56  | 2.31  | 0.28 | 42.73 | 0.95 | 2.17 | None     |
|     | granite    |         |        |        |       |      |       |      |      |          |
| 252 | Yanshanian | biotite | 76.80  | 156.73 | 7.79  | 0.49 | 20.13 | 0.91 | 3.82 | Moderate |
|     | granite    |         |        |        |       |      |       |      |      |          |
| 253 | Yanshanian | biotite | 38.12  | 100.32 | 3.49  | 0.38 | 28.77 | 0.93 | 3.02 | Light    |
|     | granite    |         |        |        |       |      |       |      |      |          |
| 254 | Yanshanian | biotite | 102.38 | 142.2  | 5.17  | 0.72 | 27.52 | 0.93 | 4.3  | Moderate |
|     | granite    |         |        |        |       |      |       |      |      |          |
| 255 | Yanshanian | biotite | 110.62 | 160.32 | 9.69  | 0.69 | 16.55 | 0.89 | 5.72 | Strong   |
|     | granite    |         |        |        |       |      |       |      |      |          |
| 256 | Yanshanian | biotite | 40.99  | 97.6   | 6.30  | 0.42 | 15.50 | 0.88 | 3.2  | Light    |
|     | granite    |         |        |        |       |      |       |      |      |          |
| 257 | Yanshanian | biotite | 58.12  | 100.2  | 3.33  | 0.58 | 30.12 | 0.94 | 4.5  | Light    |
|     | granite    |         |        |        |       |      |       |      |      |          |
| 258 | Yanshanian | biotite | 23.39  | 106.32 | 2.92  | 0.22 | 36.42 | 0.95 | 1.75 | None     |
|     | granite    |         |        |        |       |      |       |      |      |          |
| 259 | Yanshanian | biotite | 81.75  | 125.77 | 12.14 | 0.65 | 10.36 | 0.82 | 5.75 | Moderate |
|     | granite    |         |        |        |       |      |       |      |      |          |
| 260 | Yanshanian | biotite | 90.99  | 146.75 | 7.58  | 0.62 | 19.35 | 0.90 | 4.5  | Moderate |
|     | granite    |         |        |        |       |      |       |      |      |          |
| 261 | Yanshanian | biotite | 61.42  | 107.75 | 3.45  | 0.57 | 31.20 | 0.94 | 3.15 | Light    |
|     | granite    |         |        |        |       |      |       |      |      |          |
| 262 | Yanshanian | biotite | 104.49 | 160.75 | 13.01 | 0.65 | 12.36 | 0.85 | 5.41 | Strong   |

|     |                       |         |        |        |       |      |       |      |      |          |                |
|-----|-----------------------|---------|--------|--------|-------|------|-------|------|------|----------|----------------|
| 263 | granite<br>Yanshanian | biotite | 86.56  | 146.72 | 7.83  | 0.59 | 18.75 | 0.90 | 4.2  | Moderate |                |
| 264 | granite<br>Yanshanian | biotite | 118.77 | 162.7  | 5.48  | 0.73 | 29.70 | 0.93 | 3.82 | Moderate |                |
| 265 | granite<br>Yanshanian | biotite | 35.34  | 95.5   | 2.26  | 0.37 | 42.30 | 0.95 | 2.75 | None     |                |
| 266 | granite<br>Yanshanian | biotite | 39.11  | 105.7  | 2.83  | 0.37 | 37.35 | 0.95 | 3.08 | Light    |                |
| 267 | Kimberlite            |         | 18.17  | 49.1   | 1.56  | 0.37 | 31.40 | 0.94 | 3.3  | Moderate | Pu et al. [3]  |
| 268 | Kimberlite            |         | 21.00  | 60     | 3.17  | 0.35 | 18.90 | 0.90 | 1.7  | Moderate |                |
| 269 | Kimberlite            |         | 31.16  | 82     | 3.87  | 0.38 | 21.20 | 0.91 | 2.3  | Moderate |                |
| 270 | Kimberlite            |         | 46.38  | 74.8   | 2.98  | 0.62 | 25.10 | 0.92 | 3.2  | Moderate |                |
| 271 | Kimberlite            |         | 48.64  | 76     | 4.09  | 0.64 | 18.60 | 0.90 | 2.5  | Moderate |                |
| 272 | Kimberlite            |         | 22.92  | 57.3   | 1.43  | 0.40 | 40.00 | 0.95 | 1.5  | Moderate |                |
| 273 | Kimberlite            |         | 99.09  | 112.6  | 3.74  | 0.88 | 30.10 | 0.94 | 5.2  | Moderate |                |
| 274 | Kimberlite            |         | 35.16  | 79.9   | 3.12  | 0.44 | 25.60 | 0.92 | 2.5  | Light    |                |
| 275 | Kimberlite            |         | 15.84  | 49.5   | 2.16  | 0.32 | 22.90 | 0.92 | 2.8  | Moderate |                |
| 276 | Kimberlite            |         | 13.02  | 65.1   | 2.28  | 0.20 | 28.50 | 0.93 | 1.2  | Moderate |                |
| 277 | Kimberlite            |         | 21.12  | 52.8   | 2.18  | 0.40 | 24.20 | 0.92 | 2.3  | Moderate |                |
| 278 | Kimberlite            |         | 29.12  | 57.1   | 3.34  | 0.51 | 17.10 | 0.89 | 2.2  | Moderate |                |
| 279 | N/A                   |         | 30.9   | 238    | 7.60  | 0.13 | 31.20 | 0.94 | 7.40 | None     | Liu et al. [4] |
| 280 | N/A                   |         | 64.5   | 215    | 9.00  | 0.30 | 24.00 | 0.92 | 6.60 | Moderate |                |
| 281 | N/A                   |         | 75.5   | 151    | 18.20 | 0.50 | 8.30  | 0.78 | 3.10 | Light    |                |
| 282 | N/A                   |         | 68.5   | 185    | 7.70  | 0.37 | 24.10 | 0.92 | 5.00 | Moderate |                |
| 283 | N/A                   |         | 75.6   | 194    | 8.90  | 0.39 | 21.70 | 0.91 | 5.00 | Moderate |                |

|     |                      |       |       |       |      |       |      |      |          |                |
|-----|----------------------|-------|-------|-------|------|-------|------|------|----------|----------------|
| 284 | N/A                  | 57.9  | 181   | 7.50  | 0.32 | 24.10 | 0.92 | 9.30 | Moderate |                |
| 285 | N/A                  | 72.6  | 173   | 8.00  | 0.42 | 21.70 | 0.91 | 5.20 | Moderate |                |
| 286 | N/A                  | 54.9  | 183   | 9.00  | 0.30 | 20.40 | 0.91 | 5.10 | Light    |                |
| 287 | N/A                  | 62.7  | 196   | 9.00  | 0.32 | 21.70 | 0.91 | 5.00 | Moderate |                |
| 288 | N/A                  | 24.1  | 241   | 0.40  | 0.10 | 23.00 | 1.00 | 5.70 | None     |                |
| 289 | N/A                  | 50.5  | 187   | 8.60  | 0.27 | 21.70 | 0.91 | 5.00 | Moderate |                |
| 290 | N/A                  | 78.8  | 179   | 6.7   | 0.44 | 26.7  | 0.93 | 5.5  | Light    |                |
| 291 | N/A                  | 31.2  | 156   | 13.9  | 0.2  | 11.2  | 0.84 | 3.6  | None     |                |
| 292 | N/A                  | 61.6  | 162   | 9.2   | 0.38 | 17.6  | 0.89 | 9    | Moderate |                |
| 293 | N/A                  | 78.1  | 192   | 6.5   | 0.41 | 29.7  | 0.93 | 7.3  | Light    |                |
| 294 | N/A                  | 132.4 | 172   | 9.8   | 0.77 | 17.5  | 0.89 | 5.5  | Strong   |                |
| 295 | Fused tuff           | 14.49 | 70.21 | 2.04  | 0.21 | 34.42 | 0.94 | 3.11 | Light    | Jia et al. [5] |
| 296 | Sandstone            | 17.79 | 81.8  | 2.45  | 0.22 | 33.39 | 0.94 | 3.6  | Light    |                |
| 297 | Sandstone            | 22.21 | 90    | 3.1   | 0.25 | 29.03 | 0.93 | 4.3  | Light    |                |
| 298 | Micro-weathered tuff | 25.62 | 99.6  | 3.42  | 0.26 | 29.12 | 0.93 | 4.6  | Moderate |                |
| 299 | Micro-weathered tuff | 25.92 | 72.8  | 2.6   | 0.36 | 28.00 | 0.93 | 4.4  | Moderate |                |
| 300 | Weak-weathered tuff  | 26.68 | 46.8  | 1.8   | 0.57 | 26.00 | 0.93 | 2.7  | Moderate |                |
| 301 | Griotte              | 30.9  | 82.56 | 6.5   | 0.37 | 12.70 | 0.85 | 3.2  | Light    | Du et al. [6]  |
| 302 | Siltstone            | 61    | 171.5 | 22.6  | 0.36 | 7.59  | 0.77 | 7.5  | Light    |                |
| 303 | Skarn                | 89    | 128.6 | 13.2  | 0.69 | 9.74  | 0.81 | 4.9  | Strong   |                |
| 304 | Quartz sandstone     | 12.3  | 237.1 | 17.66 | 0.05 | 13.43 | 0.86 | 6.9  | None     |                |
| 305 | Dioritic porphyrite  | 55.6  | 256.5 | 18.9  | 0.22 | 13.57 | 0.86 | 9.1  | Strong   |                |
| 306 | Granite              | 67.2  | 222.6 | 10.6  | 0.30 | 21.00 | 0.91 | 7.8  | Strong   |                |
| 307 | Syenite              | 91.3  | 225.6 | 17.2  | 0.40 | 13.12 | 0.86 | 7.3  | Strong   |                |

|     |                                                |     |                                                |       |       |     |      |       |      |      |          |               |
|-----|------------------------------------------------|-----|------------------------------------------------|-------|-------|-----|------|-------|------|------|----------|---------------|
| 308 | Middle Triassic limestone, limestone and slate | and | upper marble, crystalline sandstone, and slate | 67.73 | 112.5 | 4.1 | 0.60 | 27.44 | 0.93 | 6.02 | Moderate | Wu et al. [7] |
| 309 | Middle Triassic limestone, limestone and slate | and | upper marble, crystalline sandstone, and slate | 64.43 | 112.5 | 3.4 | 0.57 | 33.09 | 0.94 | 5.8  | Light    |               |
| 310 | Middle Triassic limestone, limestone and slate | and | upper marble, crystalline sandstone, and slate | 62.88 | 112.5 | 3.4 | 0.56 | 33.09 | 0.94 | 5.62 | Moderate |               |
| 311 | Middle Triassic limestone, limestone and slate | and | upper marble, crystalline sandstone, and slate | 54.51 | 99.59 | 4.1 | 0.55 | 24.29 | 0.92 | 3.26 | Strong   |               |
| 312 | Middle Triassic limestone, limestone and slate | and | upper marble, crystalline sandstone, and slate | 52.08 | 112.5 | 3.4 | 0.46 | 33.09 | 0.94 | 4.68 | Moderate |               |

|     |                                                                         |        |        |       |      |       |      |      |          |                |
|-----|-------------------------------------------------------------------------|--------|--------|-------|------|-------|------|------|----------|----------------|
| 313 | Middle and upper Triassic limestone, limestone and sandstone, and slate | 53.93  | 112.5  | 3.4   | 0.48 | 33.09 | 0.94 | 4.5  | Moderate |                |
| 314 | Middle and upper Triassic limestone, limestone and sandstone, and slate | 68.98  | 112.5  | 4.1   | 0.61 | 27.44 | 0.93 | 5.32 | Moderate |                |
| 315 | N/A                                                                     | 91.43  | 157.63 | 11.96 | 0.58 | 13.18 | 0.86 | 6.27 | Strong   | Xue et al. [8] |
| 316 | N/A                                                                     | 19.14  | 106.31 | 2.76  | 0.18 | 38.52 | 0.95 | 2.03 | None     |                |
| 317 | N/A                                                                     | 58.05  | 147.85 | 6.98  | 0.39 | 21.18 | 0.91 | 3.62 | Moderate |                |
| 318 | N/A                                                                     | 34.89  | 151.7  | 7.47  | 0.23 | 20.31 | 0.91 | 3.17 | Light    |                |
| 319 | N/A                                                                     | 16.21  | 135.07 | 7.05  | 0.12 | 19.16 | 0.90 | 2.49 | Moderate |                |
| 320 | N/A                                                                     | 51.5   | 132.05 | 6.33  | 0.39 | 20.86 | 0.91 | 4.63 | Moderate |                |
| 321 | N/A                                                                     | 40.56  | 140.83 | 8.39  | 0.29 | 16.79 | 0.89 | 3.63 | Strong   |                |
| 322 | N/A                                                                     | 35.82  | 127.93 | 4.43  | 0.28 | 28.9  | 0.93 | 3.67 | Light    |                |
| 323 | N/A                                                                     | 33.15  | 106.94 | 5.84  | 0.31 | 18.31 | 0.90 | 2.15 | Moderate |                |
| 324 | N/A                                                                     | 9.74   | 88.51  | 2.16  | 0.11 | 40.98 | 0.95 | 1.77 | None     |                |
| 325 | N/A                                                                     | 33.94  | 117.48 | 4.23  | 0.29 | 27.77 | 0.93 | 2.37 | Light    |                |
| 326 | N/A                                                                     | 18.32  | 96.41  | 2.01  | 0.19 | 47.93 | 0.96 | 1.87 | None     |                |
| 327 | N/A                                                                     | 110.35 | 167.19 | 12.67 | 0.66 | 13.2  | 0.86 | 6.83 | Strong   |                |
| 328 | N/A                                                                     | 26.06  | 118.46 | 3.51  | 0.22 | 33.75 | 0.94 | 2.89 | Light    |                |
| 329 | N/A                                                                     | 20.82  | 122.47 | 6.22  | 0.17 | 19.69 | 0.90 | 2.81 | Light    |                |



Note: N/A is not available.

## Reference

1. Zhou, J.; Li, X.; Mitri, H. S., Classification of Rockburst in Underground Projects: Comparison of Ten Supervised Learning Methods. *Journal of Computing in Civil Engineering* **2016**, 30, (5).
2. Xue, Y.; Li, Z.; Li, S.; Qiu, D.; Tao, Y.; Wang, L.; Yang, W.; Zhang, K., Prediction of rock burst in underground caverns based on rough set and extensible comprehensive evaluation. *Bulletin of Engineering Geology and the Environment* **2019**, 78, (1), 417-429.
3. Pu, Y.; Apel, D. B.; Xu, H., Rockburst prediction in kimberlite with unsupervised learning method and support vector classifier. *Tunnelling and Underground Space Technology* **2019**, 90, 12-18.
4. Ran, L.; Ye, Y.; Hu, N.; Hu, C.; Wang, X., Classified prediction model of rockburst using rough sets-normal cloud. *Neural Computing and Applications* **2019**, 31, (6).
5. Jia, Q.; Wu, L.; Li, B.; Chen, C.; Peng, Y., The Comprehensive Prediction Model of Rockburst Tendency in Tunnel Based on Optimized Unascertained Measure Theory. *Geotechnical and Geological Engineering* **2019**.
6. Du, Z.; Xu, M.; Liu, Z.; Xuan, W., Laboratory integrated evaluation method for engineering wall rock rock-burst. *Gold* **2006**.
7. Wu, S.; Wu, Z.; Zhang, C., Rock burst prediction probability model based on case analysis. *Tunnelling and Underground Space Technology* **2019**, 93, 103069.
8. Xue, Y.; Bai, C.; Qiu, D.; Kong, F.; Li, Z., Predicting rockburst with database using particle swarm optimization and extreme learning machine. *Tunnelling and Underground Space Technology* **2020**, 98.
